# Supplementary material for: Filamentation and restoration of normal growth in Escherichia coli using a combined CRISPRi sgRNA/antisense RNA approach
Source: PubMed Central journal article supplement (PMC6133276; doi:10.1371/journal.pone.0198058), 2018-09-11

**A**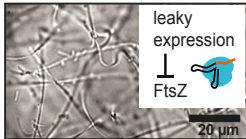**B**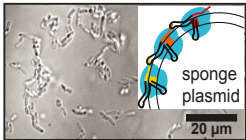**C**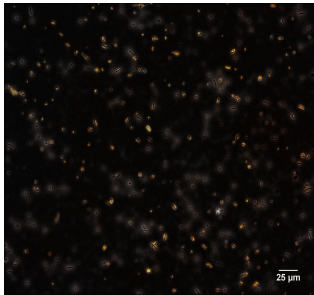

Supplement: pone.0198058.s001.pdf [file pone.0198058.s001.pdf]
