# Supplementary material for: Filamentation and restoration of normal growth in Escherichia coli using a combined CRISPRi sgRNA/antisense RNA approach
Source: PubMed Central journal article supplement (PMC6133276; doi:10.1371/journal.pone.0198058), 2018-09-11
Supplement: pone.0198058.s011.pdf [file pone.0198058.s011.pdf]

|                                                                                                                                                                                                        |
|--------------------------------------------------------------------------------------------------------------------------------------------------------------------------------------------------------|
| pZ2 target site and sponge element<br>tttcatacgcgaagtgcgtat <b>cgg</b>                                                                                                                                 |
| pZ3 target site and sponge element<br>actaaggtaatccttatgct <b>gg</b>                                                                                                                                   |
| pZ4 target site and sponge element<br>gtctgctgctcgatcggt <b>gg</b>                                                                                                                                     |
| pZ2 sgRNA<br>gggttcatacgcgaagtgcgtatggttaagagctatgctggaacagcatagcaagttaaat <b>aaggctagtc</b> cggtatcaactgaaaaagtgccaccgagtcggtgctttttt                                                                 |
| pZ3 sgRNA<br>gggactaaggtaatccttatgctggttaagagctatgctggaacagcatagcaagttaaat <b>aaggctagtc</b> cggtatcaactgaaaaagtgccaccgagtcggtgctttttt                                                                 |
| pZ4 sgRNA<br>ggggtctgctgctcgatcggtggttaagagctatgctggaacagcatagcaagttaaat <b>aaggctagtc</b> cggtatcaactgaaaaagtgccaccgagtcggtgctttttt                                                                   |
| pZ3 anti-sgRNA<br>cacttttcaagttgatacggactagccttatttaaactgctatgctgtttccagcatagctcttaaacgcataaggaattaccttagtccgcaaaaaaccccgcttgcgggggtttttcgc                                                            |
| pZ4-pZ2 anti-sgRNA<br>caagtaattgtcaacaaactccagcatagctcttaaac <b>ccgatatcgacgcagcagac</b> ctttttttccagcatagctcttaaac <b>atcgcacttgcg</b> tatgaaa <b>cag</b> agaatataaaaagccagattattaatccggctttttattattt |
