# Supplementary material for: Filamentation and restoration of normal growth in Escherichia coli using a combined CRISPRi sgRNA/antisense RNA approach
Source: PubMed Central journal article supplement (PMC6133276; doi:10.1371/journal.pone.0198058), 2018-09-11
Supplement: pone.0198058.s012.pdf [file pone.0198058.s012.pdf]

The CRISPRi plasmid was purchased from addgene (#44249). Resistance was replaced to AmpR. dCas9 is under control of a tet promoter. The plasmid was modified with sponge elements, identical to the sequences of the FtsZ promoters pZ2-4 (2) (see Table S1). The sgRNAs for the pZ2-4 sites were transcribed from a T7 phage promoter. mVenus gene was cloned as reporter protein under the TetR repressible promoter (BBa: R0040). The sequence is:

```
ATTCGCAAACGCCCTCTAATCGAAACTAATGGGGAACTGGAGAAATTGCTGGGATAAAGGGCGAGATTTTGCAC
AGTGCGCAAAGTATTGTCCATGCCCAAGTCAATATTGTCAAGAAAACAGAAGTACAGACAGGCGGATTCTCCAAG
GAGTCAATTTTACCAAAAAGAAATTCGGACAAGCTTATTGCTCGTAAAAAAGACTGGGATCCAAAAAATATGGTGG
TTTTGATAGTCCAACGGTAGCTTATTCAGTCCTAGTGGTTGCTAAGGTGAAAAAGGGAAATCGAAGAAGTAAAAAT
CCGTTAAAGAGTTACTAGGGATCACAATTATGGAAAAGAAAGTTCCTTTAAAAAATCCGATTGACTTTTTAGAAAGCTA
AAGGATATAAGGAAGTTAAAAAAGACTTAATCATTAAACTACCTAAATATAGTCTTTTTGAGTTAGAAAAACGGTCGTA
AACGGATGCTGGCTAGTGCCTGAGAAATTACAAAAAGAAATGAGCTGGCTGCTGCAAGCAAAATATGTGAATTTTTT
AATTTTAGCTAGTCAATTAGAAAAGTTGAAGGGTAGTCCAGAAGATAACGAACAAAAACAATTTGTTGGAGCAGC
ATAAGCATTATTTAGATGAGATTATTGAGCAAATCAGTGAATTTTCTAAGCGTGTTATTTTAGCAGATGCCAATTTAG
ATAAAGTTCTTAGTGCATATAACAAACATAGAGACAAACCAATACGTGAACAAGCAGAAAAATATTATTCATTTATTTAC
GTTGACGAATCTTGGAGCTCCCGCTGCTTTTAAATATTTTATACAACAATTGATCGTAAACGATATACGTCTACAAA
AGAAGTTTTAGATGCCACTCTTATCCATCAATCCATCACTGGTCTTTATGAAACACGCATTGATTTGAGTCAGCTAGG
AGGTGACTAActcagtaaggatctccaggcatcaataaacgaaaggctcagtcgaaagactggccttctgtttatctgtttgtcgggtaacgctctact
agagtcacactggctcacctcgggtggccttctcgtttatacctaggatatactcgtctcctcactgactcgtcagctcggctcgtcagctcggcgagcggga
aatggcttacgaacggggcggagattcctggaagatgccaggaagataactaacgggaagtgagagggccggcggcaaacggctttccatagctcgcggccctc
gacaagcatcacgaaatcagcgtcaaatcagtggtgcccgaacccgacggactataaagataccaggcgtttcccccggcggccctcgtgctcctctgttcc
tgcttctcgtttaccgggtgcttccgctgttattgcccgtttgctcattccacgctgacactcagttccgggtgagcagttcgtccaagctggagctgtatgcacgaacc
cccgttcagtcggaccgctcgccttaccgtaactatcgtctgagtcacaccggaaagacatgcaaaagcaccactggcagcagccactgtaattgatttagagg
agttagcttgaagtcagtcggcgttaaggctaaactgaaaggacaagtttggtagctcgtcctcaagccagttactcgttcaagagttgtagctcagagaa
cctcgaaaaaccgcccgtcaaggcgggtttttcgtttcagagcaagagattacgcgagaccaaaacgatctcaagaagatcatttaaacagataaaatattctag
atctcagtgcaatttatctctcaaatgtagcacctgaagtcagccccatagataaagttgtagtcttaccggcaaaaaaccccgttcggcggggtttttcgcgcttt
aatttCCAATGCTTAATCAGTGAGGCACCTATCTCAGCGATCTGTCTATTTTCGTTTCATCCATAGTTGCCTGACTCCCC
GTCGTGTAGATAACTACGATACGGGAGGGCTTACCATCTGGCCCCAGTGTGCAATGATACCCGCGAGACCCACGC
TCACCGGCTCCAGATTTATCAGCAATAAACCCAGCCAGCCGGAAGGGCCGAGCGCAGAAGTGGTCTGCAACTTTA
TCCGCTCCATCCAGTCTATTAATTGTTGCCGGGAAGCTAGAGTAAGTAGTTCGCCAGTTAATAGTTTGCGCAACGT
TGTTGCCATTGCTACAGGCATCGTGGTGTACGCTCGTCTGTTGGTATGGCTTCATTCAGCTCCGGTCCCAACGA
TCAAGGCCGAGTTACATGATCCCCATGTTGTGCAAAAAAGCGGTTAGCTCCTTCGGTCCCTCCGATCGTTGTCAGAA
GTAAGTTGGCCGAGTGTATCACTCATGGTTATGCGCAGCACTGCATAATTCTCTTACTGTCAAGCCATCCGTAAGA
TGCTTTTTCTGTACTGGTGTAGTACTCAACCAAGTCACTTGTAGAATAGTGTATGCGGCGACCGAGTTGTCTTGCC
CGGCGTCAATACGGGATAATACCGCGCCACATAGCAGAACTTAAAAGTGCTCATcattggaaacgcttctcggggcgaaaactc
tcaaggatcttaccgctgtgagatccagttcagtgtaaccactcgtgcaccaactgatctcagcatctttacttaccagcgttctgggtgagcaaaaacaggaagg
caaatgccgcaaaaaagggaataaggcggacacggaatgtgaatactatactctcttttcaatcagtgattgaagcattatcagggttattgtctatgagcggat
acatattgtagatattagaaaaataaacaataaataaagccggcactaagtaattccttagctggatatacgtgtccagttctatctatcgaagttcaatt
atacatgctcgtcgtcgtatcgggtggcgtaccagtggtcgtcgtatcagtagggggcggcgtaggataaataatttccatagcgaagtcagatgccgcatcgcac
ttcgtatgaaaaattatttatgtaaacgactcactatagggttccatagcgaagtcgctatgtaaaagcgtatgctggaacagcagatagcaagtttaataaggctagt
cggttatacaactgaaaaagtgccaccgagtcgggtgcttttttaagtcctagactcgcacatgagcaaaacggtagagcgtcactttcactagtgctcggccgctataac
gactcactatagggaactaagtaattccttagctgctttaaagagctatgctggaacagcagatagcaagtttaataaggctagtcggtatcaactgaaaaagtgccaccga
gctggtgcttttttaagtccttagagtggtgactcgggactcgtgactcgtcagtgactcgtcaggtggaatagcagctcaggtatgtaaacgactcagctcagctcag
tatcgggtttaaagagctatgctggaacagcagatagcaagtttaataaggctatgctggtatcaactgaaaaagtgccaccgagtcgggtgctttttttgcgctgagccag
gcatcaataaaacgaaaggctcagtcgaaagactggccttctgtttatctgtttgtcgggtaacgctctactagagtcacactggctcacctcgggtggccttctc
tgctttatattctagatagtgactagtgcttgattctcacaataaaaaacggcggcggcaaccgagcgttctgaacaatccagatggagtctgaggtcattactg
gatctatcaacagaggtccaagcagcgtcagatcaaaaccctatcagtgatagagattgacatccctatcagtgatagagatactgagcagcgggtctatactagagaaa
gaggagaaatactagATGAGCAAAGGGCGAAGAAGTGTTCACGGGTGTGGTTCCGATCCTGGTTGAACTGGATGGCGATG
TGAACGGTCATAAAATTTAGCGTGTCTGGTGAAGGCGAAGGTGATGCGACCTACGGCAAACCTGACGCTGAAACTGAT
TTGCACCACGGGTAACCTGCCGTTCCGTTGGCCGACCTGGTGACACCGCTGGTTATGGTCTGATGTGTTTCCG
ACGTTACCCGGATCACATGAAACGCCATGATTTCTTTAAATCTGCGATGCCGGAAGGCTATGTGCAGGAACGTACC
ATCTTTTTCAAAGATGATGGTAACTACAAAACCCGCGCGGAAGTAAAATTTGAAGGCGATACGCTGGTGAACCGTAT
TGAAGTGAAGGTATCGATTTCAAAGAAGATGGCAATATTCTGGGTCACAAAACCTGGAATACAACACTACAACAGTCATA
ACGTGTACATTACCGCCGATAAACAGAAAAACGGTATCAAAGCAAACCTCAAATCCGTCACAACATCGAAGATGGC
GGTGTTCAGCTGGCCGATCAATTACCAGCAGAACACCCCGATTGGCGATGGTCCGGTGTCTGCCGGATAATCAT
TATCTGAGTTACCAGCAAACTGTCTAAAGATCCGAATGAAAAACGCGATCACATGTTTCTGTCTGCTGGAATTTGTGAC
CGCGGGCCGACTACGCAATGGTATGGATGAACTGTATAAAtaacgtctcattttccagatagcagctcctaagcccactttcacatttaagt
tgttttctaactcagatagatcaattcaaggcgaataaagaggtgctcgtcgcacttggtagcaataaattcagatagcttgcgtaataatggcggcactatcagtag
taggtgttcccttctttagcactgtagtctctgacttccaatacgcacacaaagtaaaatgccccacagcgtgagtgatataatgacttctagtgaaaaacctt
gttggcataaaaaaggtaattgattttcagagatttcatactgttttctgtagccgtgtacctaaatgtacttttctccatcggatgacttagtaaaagcacatctaaaacttta
gcttattacgtaaaaaacttgcagcttcccttcaaaagggcaaaagtgatgtggtcctatcaacatcctaagtgtaaggcgtgagcaaaagcccgtattttta
catgccaatacaatgtaggctgctcacctaactctggtggcaggtttacgggtgttaaaccttcgattccgacctcattaagcagctcattgctggttaatacacttacttt
```

atctaactagacatcattaattcctaattttgttgacactctatcgttgatagagttatctaccactccctatcagtgatagagaaaagaattcaaaagatctaaagaggaga  
aaggatctATGGATAAGAAATACTCAATAGGCTTAGCTATCGGCACAAATAGCGTCGGATGGGCGGTGATCACTGATG  
AATATAAGGTTCCGTCTAAAAAGTTCAAGGTTCTGGGAAATACAGACCGCCACAGTATCAAAAAAATCTTATAGGG  
GCTCTTTTATTTGACAGTGGAGAGACAGCGGAAGCGACTCGTCTCAAACGGACAGCTCGTAGAAGGTATACACGTC  
GGAAGAATCGTATTTTGTATCTACAGGAGATTTTTCAAATGAGATGGCGAAAGTAGATGATAGTTTCTTTCATCGAC  
TTGAAGAGTCTTTTTTGGTGGAAAGAAGACAAGAAGCATGAACGTCATCCTATTTTTGGAAATATAGTAGATGAAGTT  
GCTTATCATGAGAAAATCCAACATCTATCATCTGCGAAAAAAATTGGTAGATTCTACTGATAAAGCGGATTTGCGC  
TTAATCTATTTGGCCTTAGCGCATATGATTAAGTTTCGTGGTCATTTTTTGATTGAGGGAGATTTAAATCCTGATAATA  
GTGATGTGGACAAACTATTTATCCAGTTGGTACAAACCTACAATCAATTATTTGAAGAAAACCTATTAACGCAAGTG  
GAGTAGATGCTAAAGCGATTCTTTCTGCACGATTGAGTAAATCAAGACGATTAGAAAATCTCATTGCTCAGCTCCCC  
GGTGAGAAGAAAAATGGCTTATTTGGGAATCTCATTGCTTTGTCATTGGGTTTGACCCCTAATTTTAAATCAAATTTT  
GATTTGGCAGAAGATGCTAAATACAGCTTTCAAAGATACTTACGATGATTTAGATAATTTATTTGGCGCAAATTT  
GGAGATCAATATGCTGATTTGTTTTGGCAGCTAAGAATTTATCAGATGCTATTTTTACTTTTCAGATATCCTAAGAGTA  
AATACTGAAATAACTAAGGCTCCCCTATCAGCTTCAATGATTAACGCTACGATGAACATCATCAAGACTTGACTCTT  
TTAAAAGCTTTAGTTGACAACAACCTCCAGAAAAGTATAAAGAAATCTTTTTTGATCAATCAAAAAACGGATATGCA  
GGTTATATTGATGGGGGAGCTAGCCAAGAAGATTTTATAAATTTATCAAACCAATTTTAGAAAAAATGGATGGTACT  
GAGGAATTTATGGTGAACATAATCGTGAAGATTTGCTGCGCAAGCAACGGACCTTTGACAACGGCTCTATTCCCC  
ATCAAATTCACCTGGGTGAGCTGCATGCTATTTTGAAGAAGACAAGAAGACTTTTATCCATTTTTAAAAGACAATCGTG  
AGAAGATTGAAAAAATCTTGACTTTTTGCAATTCCTTATTATGTTGGTCCATTGGCGCGTGGCAATAGTCGTTTTGTCAT  
GTGATGAAACAGCTTAAACGTCGCCGTTATACTGGTTGGGACGTTTTGTCTCGAAAATTTGATTAATGGTATTAGGGA  
TAAGCAATCTGGCAAAAACAATATTAGATTTTTTGAATCAGATGGTTTTTGCCAATCGCAATTTTTATGCAGCTGATCCA  
TGATGATAGTTTGACATTTAAGAAGACATTCAAAAAGCACAAGTGTCTGGACAAGGCGATAGTTTACATGAACATA  
TTGCAATTTAGCTGGTAGCCCTGCTATTA AAAAAGGTATTTTACAGACTGTAAAAGTTGTTGATGAATTGGTCAAAG  
TAATGGGGCGGCATAAGCCAGAAAATATCGTTATTGAAATGGCACGTGAAAATCAGACAACCTAAAAGGGCCAGAA  
AAATTCGCGAGAGCGTATGAAACGAATCGAAGAAGGTATCAAAGAATTAGGAAGTCAGATTCTTAAAGAGCATCCT  
GTTGAAAATACTCAATTGCAAAAATGAAAAGCTCTATCTCTATTATCTCCAAAATGGAAGAGACATGTATGTGGACCAA  
GAATTAGATATTAATCGTTTAAAGTATTATGATGTCGATGCCATTGTTCCACAAAAGTTTCCTTAAAGACGATTCAATA  
GACAATAAGGTCTTAAACGCGTTCTGATAAAAATCGTGGTAAATCGGATAACGTTCCAAGTGAAGAAGTAGTCAAAAA  
GATGAAAAACTATTGGAGACAACCTTAAACGCCAAGTTAATCACTCAACGTAAGTTTGATAATTTAACGAAAAGCTGA  
ACGTGGAGGTTTTGAGTGAACCTTGATAAAGCTGGTTTTATCAAACGCCAATTGGTTGAAACTCGCCAAATCACTAAGC  
ATGTGGCACAAATTTTGATAGTGCATGAATACTAAATACGATGAAAATGATAAATTTATTCGAGAGGTTAAAGTGA  
TTACCTTAAAATCTAAATAGTTTCTGACTTCCGAAAAGATTTCCAATTCTATAAAGTACGTGAGATTAACAATTACCA  
TCATGCCCATGATGCGTATCTAAATGCCGTCGTTGGAAGTCTTTGATTAAGAAATATCCAAAACCTTGAATCGGAGT  
TTGTCTATGGTGATTATAAAGTTTATGATGTTTCTGATAAATGATTGCTAAGTCTGAGCAAGAATAGGCAAGCAACC  
GCAAAAATATTTCTTTACTCTAATATCATGAACCTCTTCAAACAGAAATTACACTTGCAAATGGAGAG

The high copy number sponge plasmid (backbone: pSB1K3) is compatible with the CRISPRi plasmid and was constructed with an *mrfp1* (BBa\_J04450) reporter gene under control of a lac promoter. We found that in LB medium this reporter is constitutively expressed. Furthermore, we added pZ2-4 sponge elements. The sequence is:

```
tactagtactaaggtaattcctatgctggatatatacgtgtccagttcttctctatatcgaaagttcaattatacatgctgcgctcgctgatatcggiggcgtaccagtggttcg
tgtcatctaggaggcgctaggtataaataatttcatacgcgaagtcggtacggctgcagtcgccgcaaaaaaggcaaggtgtaccaccctgcccttttcttaaaa
ccgaaaagattactcgcgttatgcaggcttctcgtcactgactcgtcgcctcggctcgttcggctgcggcgagcggtatcagctcactcaaggccgtaatacggttat
ccacagaatcaggggataacgcaggaaagaacatgtgagcaaaaaggccagcaaaaaggccaggaaccgtaaaaaggccgctgtggtgtttccacaggctcc
gccccctgacgagcatcaaaaaatcagcgtcaagtcagaggtggcgaacccgacaggactataaagataaccaggcgttccccctggaagctcctcgtgcgc
tctctgttccgaccctgccgttaccggataacctgcccttctccctcgggaagcgtggccttctcatagctcagctgtaggtatctcagttcgggtgtaggtcgttcgc
tccaagctgggtgtgtgacgaacccccgttaccggaccgctgcgccttaccggtaactatcgtcttgtagtccaaccggtaagacacgacttatcgccactggca
gcagccactggttaacaggattagcagagcgaggtatgtaggcgtgtacagagttctgaagtggtggcctaactacggctacactagaagaacagtatttgatctgc
cgctcgtgtaagccagttacctcgaaaaagagttggtagctctgtaccggcaaacaccaccgctggtagcggtgtttttgttgcaagcagcagattaccgcc
agaaaaaaggatcaagaagatccttctgtcttctacgggctgcagctcagtggaacgaaactcacggttaagggtttgtgcatgagattcaaaaaggatct
tcacctagatcctttaaataaaaaatgaagtttaaatcaatcaaatgatatatgagtaaactggctgcagcgtcagtcgccgtaagtcagcgtatgctcgcaggtt
acaaccaattaaccaattctgattagaaaaactcatcgagcatcaaatgaaactgcaattattcatatcaggattatcaataccatattttgaaaaagccgttctgtaatga
aggagaaaactaccgagcagttccataggatggcaagatcctgttatcggctcgcgattccgactcgtccaacatcaatacaacctattatccccctgcaaaaat
aaggttatcaagtgagaatcaccatgagtgacgactgaatccggtgagaatggcaaaagcttatgattttccagactgttcaacaggccagccattacgctcgtca
tcaaatcactcgcatacaaaaaccgttattcattcgtgattgcgcctgagcgagacgaaatacgcgactcgtgttaaaaggacaattacaaacaggaatcgaatgca
accggcgcaggaacactgcagcgcatacaaatatttcacctgaatcaggatattcttaataacctggaatgctgtttccggggatcgagtggtgagtaaccatgc
atcagcaggtagcggataaaaatgctgtggtcggagagataaaatccgtcagccagtttagctgacctctcatctgtaacatcattggcaacgctaccttgccat
gtttcagaacaactcggcgcacggttccatacaatcgatagattgtcgcacctgattgccgacattatcggagcccattatacccatataaatcagcatccatg
ttggaattaatcgcggcctggagcaagacgtttccggtgaatgtgctcataacaccctgtattactgtttatgtaagcagacagttttattgttcatgatgatattttatctt
gtgcaatgtaacatcagagattttgagacacaacgtgcttgtgtaataatcgaacttttctgagttgaaaggatcagctcagtgccacctgacgtctaagaaccatta
ttatcatgacattaacctataaaaaataggcgtatcacgagcagaattcagataaaaaaatccttagcttccgtaaggtatctggaattcggcggccttctagag
caatacgaacaccgcttccccgcggttgccgattcattaatgcagctggcacgacaggttccccgactggaaagcgggacgtgagcgcaacgcaattaatgtga
gttagctcactcattaggcaccaccgcttacactttatgctccggctcgtatgtgtgtggaattgtgagcggataacaattcacacatactagagaagaggagaaaat
actagATGGCTTCCCGAAGACGTTATCAAAGAGTTTCATGCGTTTCAAAGTTTCGTATGGAAGGTTCCGTTAACGGTC
ACGAGTTCGAAATCGAAGGTGAAGGTGAAGGTGCTCCGTACGAAGGTACCCAGACCGCTAAACTGAAAGTTACCA
AAGGTGGTCCGCTGCCGTTCCGTTGGGACATCCTGTCCCGCAGTTCAGTACGGTTCCAAAGCTTACGTTAAACA
CCCGGCTGACATCCCGACTACCTGAAACTGTCTTCCCGGAAGGTTTCAAATGGGAACGTGTTATGAACTTCGAA
GACGGTGGTGTGTTACCGTTACCCAGGACTCCTCCCTGCAAGACGGTGAGTTCATCTACAAAGTTAAACTGCGTG
GTACCAACTTCCCGTCCGACGGTCCGTTATGCAGAAAAAACCATGGGTTGGGAAGCTTCCACCGAACGTATGTA
CCCGAAGACGGTGCTCTGAAAGGTGAAATCAAATCGCTCTGAAACTGAAAGACGGTGGTCACTACGACGCTGA
AGTTAAAACCACTACATGGCTAAAAAACCGGTTTCAGCTGCCGGGTGCTTACAAAACCGACATCAAACCTGGACATC
ACCTCCCACAACGAAGACTACACCATCGTTGAACAGTACGAACGTGCTGAAAGTCTGCTACTCCACCGGTGCTtaataa
cgctgatagtgtagtagatcgctactagagccagcgcataaaaacgaaaggctcagtcgaaagactgggcttctggtttatctgtgtgtcgggtaacgctctct
actagagtcacactgctcaccttccgggtggccttctcgtttata
```
