# Supplementary material for: Filamentation and restoration of normal growth in Escherichia coli using a combined CRISPRi sgRNA/antisense RNA approach
Source: PubMed Central journal article supplement (PMC6133276; doi:10.1371/journal.pone.0198058), 2018-09-11
Supplement: pone.0198058.s013.pdf [file pone.0198058.s013.pdf]

|                                                                                                                                                                                                                                                                          |
|--------------------------------------------------------------------------------------------------------------------------------------------------------------------------------------------------------------------------------------------------------------------------|
| <p>mVenus zoom in into the DNA region of interest</p> <p>...cacag<b>taatac</b>gactcactataggg<b>gaattgtgagcggataacaat</b>cccctctagaataattttgttaactttaagaaggagatatacat<b>ATG</b>AGCAAAGGC<br/> GAAGAACTGTTACGGGTGTGGTT<b>CCG</b><b>ATCCTGGTTGAACTGG</b>ATGGCGATGTGA...</p> |
| <p>mVenus-sgRNA</p> <p><b>GGGCCAUCCAGUUCAACCAGGAU</b>GUUUUAAGAGCUAUGCUGGAAACAGCAUAGCAAGUUUAAAUAAGGCUAGUCC<br/> GUUAUCAACUUGAAAAAGUGGCACCGAGUCGGUCGUUUUUUUACACUGUCUGCAGUCCGGACACGCACC</p>                                                                                 |
| <p>mVenus anti-sgRNA(42)</p> <p><b>GGG</b>AUUUCCAGCAUAGCUCUUA AAC<b>AUCCUGGUUGAACUGGAUGG</b>CCACACUGUCUGCAGUCCGGACACGCAC<br/> CAG</p>                                                                                                                                    |
| <p>mVenus anti-sgRNA(56)</p> <p><b>GGG</b>CACUUUUUCAAGUUGAU AACGACUUGC UAUGCUGUUUCCAGCAUAGCUCUUA AAC<b>AUCCUGGUUGAACUG</b><br/> <b>GAUGG</b>CCACACUGUCUGCAGUCCGGACACGCACC</p>                                                                                            |

T7pol promoter and transcription start (GGG), pLacO, target site, dCas9handle, artificial terminator, **bold**: PAM site
