# Supplementary material for: Filamentation and restoration of normal growth in Escherichia coli using a combined CRISPRi sgRNA/antisense RNA approach
Source: PubMed Central journal article supplement (PMC6133276; doi:10.1371/journal.pone.0198058), 2018-09-11
Supplement: pone.0198058.s014.pdf [file pone.0198058.s014.pdf]

| <b>Reference genes</b>  | <b>Target gene</b>      |
|-------------------------|-------------------------|
| <b>R_RT_cysG</b>        | <b>R_RT_ftsZ</b>        |
| CAGGTGTCGAGAAGGCTTTC    | CAGTTTGTTCGTTCCGGGATAGT |
| <b>cysG_qPCR_FWD</b>    | <b>ftsZ_qPCR_FWD</b>    |
| TTGTCGGCGGTGGTGATGTC    | CTTTGAAGGCAAGAAGCGTATG  |
| <b>cysG_qPCR_REV</b>    | <b>ftsZ_qPCR_REV</b>    |
| ATGCGGTGAACTGTGAATAAACG | CAGTTTGTTCGTTCCGGGATAGT |
|                         |                         |
| <b>R_RT_rrsB</b>        |                         |
| GAGTCTGGACCGTGTCTCAG    |                         |
| <b>rrsB_qPCR_FWD</b>    |                         |
| GCTTGCTTCTTTGCTGACGAG   |                         |
| <b>rrsB_qPCR_REV</b>    |                         |
| ATCTGGGCACATCCGATGGC    |                         |
