# Supplementary material for: Filamentation and restoration of normal growth in Escherichia coli using a combined CRISPRi sgRNA/antisense RNA approach
Source: PubMed Central journal article supplement (PMC6133276; doi:10.1371/journal.pone.0198058), 2018-09-11
Supplement: pone.0198058.s015.pdf [file pone.0198058.s015.pdf]

| <i>rrsB</i>                                     | Cq     | Cq_mean | StDev_Cq | <i>cysG</i> | Cq     | Cq_mean | StDev_Cq | <i>ftsZ</i> | Cq     | Cq_mean      | StDev_Cq    |
|-------------------------------------------------|--------|---------|----------|-------------|--------|---------|----------|-------------|--------|--------------|-------------|
| 1:100                                           | 8.1652 | 8.18    | 0.07     | 1:100       | 22.68  | 22.85   | 0.17     | 1:100       | 20.265 | <b>20.27</b> | <b>0.10</b> |
| 1:1000                                          | 12.967 | 12.01   | 0.89     | 1:1000      | 25.738 | 26.28   | 0.50     | 1:1000      | 23.268 | 23.22        | 0.30        |
| 1:10.000                                        | 16.357 | 15.96   | 0.38     | 1:10.000    | 28.988 | 29.36   | 0.33     | 1:10.000    | 26.618 | 26.39        | 0.41        |
| 1:100.000                                       | 19.297 | 19.02   | 0.25     | 1:100.000   | 32.633 | 32.20   | 0.38     | 1:100.000   | 29.87  | 29.63        | 0.41        |
| 1:1.000000                                      | 22.607 | 22.34   | 0.32     | I_1:100     | 22.927 | 23.04   | 0.10     | 1:1.000000  | 33.111 | 32.57        | 0.64        |
| I_1:100                                         | 8.5986 | 7.92    | 0.58     | SwB_1:100   | 23.623 | 23.77   | 0.14     | I_1:100     | 22.59  | <b>22.84</b> | <b>0.50</b> |
| SwB_1:100                                       | 7.1069 | 7.05    | 0.06     | 1:100       | 22.859 |         |          | SwB_1:100   | 20.801 | <b>20.65</b> | <b>0.18</b> |
| 1:100                                           | 8.2559 |         |          | 1:1000      | 26.383 |         |          | 1:100       | 20.374 |              |             |
| 1:1000                                          | 11.203 |         |          | 1:10.000    | 29.629 |         |          | 1:1000      | 23.489 |              |             |
| 1:10.000                                        | 15.596 |         |          | 1:100.000   | 32.01  |         |          | 1:10.000    | 26.631 |              |             |
| 1:100.000                                       | 18.898 |         |          | I_1:100     | 23.13  |         |          | 1:100.000   | 29.867 |              |             |
| 1:1.000000                                      | 21.99  |         |          | SwB_1:100   | 23.807 |         |          | 1:1.000000  | 32.746 |              |             |
| I_1:100                                         | 7.5724 |         |          | 1:100       | 23.025 |         |          | I_1:100     | 23.415 |              |             |
| SwB_1:100                                       | 7.0519 |         |          | 1:1000      | 26.727 |         |          | SwB_1:100   | 20.709 |              |             |
| 1:100                                           | 8.1095 |         |          | 1:10.000    | 29.476 |         |          | 1:100       | 20.18  |              |             |
| 1:1000                                          | 11.856 |         |          | 1:100.000   | 31.954 |         |          | 1:1000      | 22.889 |              |             |
| 1:10.000                                        | 15.926 |         |          | I_1:100     | 23.059 |         |          | 1:10.000    | 25.92  |              |             |
| 1:100.000                                       | 18.851 |         |          | SwB_1:100   | 23.894 |         |          | 1:100.000   | 29.152 |              |             |
| 1:1.000000                                      | 22.431 |         |          |             |        |         |          | 1:1.000000  | 31.861 |              |             |
| I_1:100                                         | 7.601  |         |          |             |        |         |          | I_1:100     | 22.506 |              |             |
| SwB_1:100                                       | 6.9897 |         |          |             |        |         |          | SwB_1:100   | 20.445 |              |             |
|                                                 |        |         |          |             |        |         |          | -RT_1:100   | 33.228 |              |             |
|                                                 |        |         |          |             |        |         |          | -RT_1:100   | 33.271 |              |             |
| <b>Ref. gene stability (mean of NI, I, SwB)</b> |        | 7.72    | 0.30     |             |        | 23.22   | 0.03     |             |        |              |             |

I= induced with 1 mM IPTG, 107 nM aTc (= filamentous samples), SwB = switch back samples (previously treated with 1 mM IPTG, 107 nM aTc and 100 nM AHL)
