# Supplementary material for: Filamentation and restoration of normal growth in Escherichia coli using a combined CRISPRi sgRNA/antisense RNA approach
Source: PubMed Central journal article supplement (PMC6133276; doi:10.1371/journal.pone.0198058), 2018-09-11
Supplement: pone.0198058.s016.pdf [file pone.0198058.s016.pdf]

|                    | <b>equation</b>              | <b>amplification efficiency</b> |
|--------------------|------------------------------|---------------------------------|
| <b><i>rrsB</i></b> | $y = -3.6 + 0.7, R^2 > 0.99$ | 90%                             |
| <b><i>cysG</i></b> | $y = -3.0 + 17, R^2 > 0.99$  | 115%                            |
